# Supplementary material for: Combined effects of FH (E404D) and ACOX2 (R409H) cause metabolic defects in primary cardiac malignant tumor
Source: PubMed Central journal article supplement (PMC6056498; doi:10.1038/s41420-018-0072-3), 2018-07-23
Supplement: 41420_2018_72_MOESM1_ESM.pdf [file 41420_2018_72_MOESM1_ESM.pdf]

**Table S1.** 42 genes were included in the 7 somatic CNVs with absolute log2ratio value > 0.4 in both Chip-2 and Chip-3.

| Cytoband         | Start     | End           | Length/bp | log2ratio         |                 | Genes in Fragment                                                                                                                                                                                               |
|------------------|-----------|---------------|-----------|-------------------|-----------------|-----------------------------------------------------------------------------------------------------------------------------------------------------------------------------------------------------------------|
|                  |           |               |           | Chip-2<br>Tt-Ctrl | Chip-3<br>Tt-Nt |                                                                                                                                                                                                                 |
| 5q35.2           | 176349059 | 17644189<br>9 | 92841     | -0.6              | -0.6            | <i>UIMC1</i>                                                                                                                                                                                                    |
| 9p21.3           | 21863204  | 22052139      | 188936    | -0.4              | -0.4            | <i>MTAP, C9orf53, CDKN2A, CDKN2BAS, CDKN2B</i>                                                                                                                                                                  |
| 14q24.2          | 71826496  | 71951470      | 124975    | -0.5              | -0.6            | <i>SNORD56B</i>                                                                                                                                                                                                 |
| 16p13.3          | 5441115   | 7072584       | 1631470   | -0.5              | -0.5            | <i>A2BP1</i>                                                                                                                                                                                                    |
| 16p12.2          | 23442748  | 23671709      | 228962    | -0.4              | -0.4            | <i>COG, GGA, EARS, UBF1, NDUFAB1, PALB2, DCTN5</i>                                                                                                                                                              |
| 14q23.1-<br>23.2 | 59601248  | 63922169      | 4320922   | 0.4               | 0.4             | <i>DAAMI, GPR135, C14orf149, JKAMP, C14orf38, RTN1, C14orf135, DHRS7, PPM1A, C14orf39, SIX6, SIX1, SIX4, MNAT1, TRMT5, SLC38A6, TMEM30B, PRKCH, HIF1A, SNAPC1, SYT16, FLJ43390, KCNH5, RHOJ, GPHB5, PPP2R5E</i> |
| 17p13.2          | 1959569   | 1959686       | 118       | 1.5               | 1.4             | <i>HIC1</i>                                                                                                                                                                                                     |
