# Supplementary material for: Combined effects of FH (E404D) and ACOX2 (R409H) cause metabolic defects in primary cardiac malignant tumor
Source: PubMed Central journal article supplement (PMC6056498; doi:10.1038/s41420-018-0072-3), 2018-07-23
Supplement: 41420_2018_72_MOESM2_ESM.pdf [file 41420_2018_72_MOESM2_ESM.pdf]

**Table S2. 86 germline nonsynonymous mutations were identified in blood sample of patient-1 by Exome sequencing.**

| #Symbol      | Location           | Transcript             | Protein_position | Amino_acids | Codons         |
|--------------|--------------------|------------------------|------------------|-------------|----------------|
| ACOX2        | 3:58512313         | ENST00000459701        | 395              | R/H         | cGc/cAc        |
| ADAMTS14     | 10:72513635        | ENST00000373208        | 940              | L/M         | Ctg/Atg        |
| ADAP2        | 17:29276342        | ENST00000581548        | 110              | R/H         | cGt/cAt        |
| ADGRG4       | X:135430483        | ENST00000370652        | 1540             | S/P         | Tct/Cct        |
| AHNAK        | 11:62303548        | ENST00000528508        | 8                | R/Q         | cGg/cAg        |
| ALCAM        | 3:105264151        | ENST00000306107        | 359              | S/N         | aGc/aAc        |
| ALDH4A1      | 1:19209799         | ENST00000538309        | 133              | N/H         | Aac/Cac        |
| ANKRD36      | 2:97877478         | ENST00000461153        | 1157             | V/M         | Gtg/Atg        |
| ANXA9        | 1:150958836        | ENST00000368947        | 166              | D/G         | gAc/gGc        |
| ARPIN        | 15:90446572        | ENST00000560096        | 70               | C/Y         | tGt/tAt        |
| ATP6V1E2     | 2:46739684         | ENST00000306448        | 56               | Y/C         | tAt/tGt        |
| <b>BRCA2</b> | <b>13:32911755</b> | <b>ENST00000544455</b> | <b>1088</b>      | <b>P/H</b>  | <b>cCt/cAt</b> |
| BTN3A3       | 6:26451927         | ENST00000490254        | 138              | T/M         | aCg/aTg        |
| CA2          | 8:86392912         | ENST00000285379        | 226              | R/H         | cGt/cAt        |
| CEP78        | 9:80879095         | ENST00000376598        | 496              | N/K         | aaT/aaA        |
| CFAP54       | 12:96900715        | ENST00000298953        | 193              | L/V         | Ttg/Gtg        |
| CTSH         | 15:79227412        | ENST00000528741        | 29               | T/P         | Acc/Ccc        |
| CX3CR1       | 3:39307666         | ENST00000542107        | 112              | G/A         | gGc/gCc        |
| DDX53        | X:23019317         | ENST00000327968        | 381              | M/I         | atG/atT        |
| DHODH        | 16:72048535        | ENST00000572887        | 133              | V/A         | gTc/gCc        |
| DNAH3        | 16:20966299        | ENST00000261383        | 3636             | P/H         | cCc/cAc        |
| FAN1         | 15:31218141        | ENST00000362065        | 829              | Q/H         | caG/caC        |
| <b>FH</b>    | <b>1:241665767</b> | <b>ENST00000366560</b> | <b>404</b>       | <b>E/D</b>  | <b>gaG/gaC</b> |
| GPR176       | 15:40099241        | ENST00000543580        | 86               | T/A         | Acc/Gcc        |
| GPRIN2       | 10:46999019        | ENST00000374317        | 47               | V/M         | Gtg/Atg        |
| GPRIN2       | 10:46999484        | ENST00000374317        | 202              | G/W         | Ggg/Tgg        |
| GPRIN2       | 10:46999922        | ENST00000374314        | 348              | V/L         | Gtg/Ttg        |
| GRIK1        | 21:31015249        | ENST00000399913        | 332              | A/V         | gCc/gTc        |
| HELZ2        | 20:62198745        | ENST00000467148        | 656              | V/M         | Gtg/Atg        |
| HYDIN        | 16:71101200        | ENST00000288168        | 707              | T/A         | Aca/Gca        |
| HYDIN        | 16:71098649        | ENST00000393552        | 342              | N/D         | Aat/Gat        |
| IMMT         | 2:86400824         | ENST00000254636        | 37               | P/S         | Cct/Tct        |
| KIAA1683     | 19:18368720        | ENST00000600359        | 892              | R/H         | cGt/cAt        |
| KIAA1755     | 20:36850938        | ENST00000435901        | 76               | G/D         | gGc/gAc        |
| KLHL10       | 17:39998487        | ENST00000293303        | 203              | V/I         | Gta/Ata        |
| KRT40        | 17:39140272        | ENST00000377755        | 85               | F/S         | tTc/tCc        |
| LAMA4        | 6:112430669        | ENST00000230538        | 1815             | V/I         | Gta/Ata        |
| LAMA4        | 6:112457383        | ENST00000522006        | 1112             | P/R         | cCt/cGt        |
| LILRB4       | 19:55179364        | ENST00000391736        | 414              | Q/R         | cAg/cGg        |
| LIPH         | 3:185245370        | ENST00000296252        | 177              | L/R         | cTc/cGc        |

|          |              |                 |      |     |         |
|----------|--------------|-----------------|------|-----|---------|
| LRRC49   | 15:71329621  | ENST00000560369 | 608  | R/C | Cgt/Tgt |
| MAP3K9   | 14:71197492  | ENST00000553414 | 707  | R/C | Cgc/Tgc |
| MBD5     | 2:149226897  | ENST00000404807 | 462  | S/L | tCa/tTa |
| METTL21B | 12:58166617  | ENST00000333012 | 37   | G/E | gGg/gAg |
| MST1R    | 3:49934990   | ENST00000344206 | 670  | V/G | gTa/gGa |
| MXRA5    | X:3238733    | ENST00000217939 | 1665 | P/S | Cca/Tca |
| NEB      | 2:152390806  | ENST00000172853 | 5413 | R/W | Cgg/Tgg |
| NEDD9    | 6:11190208   | ENST00000379446 | 632  | V/I | Gtc/Atc |
| NLRX1    | 11:119052976 | ENST00000409265 | 843  | A/V | gCg/gTg |
| NOX5     | 15:69329422  | ENST00000260364 | 397  | H/Y | Cat/Tat |
| NT5C3B   | 17:39983808  | ENST00000415460 | 183  | S/C | tCt/tGt |
| OR4M2    | 15:22368862  | ENST00000332663 | 96   | G/E | gGa/gAa |
| OSCAR    | 19:54598604  | ENST00000358375 | 225  | Y/S | tAc/tCc |
| PARD3    | 10:34637007  | ENST00000346874 | 702  | P/S | Ccc/Tcc |
| PDE4DIP  | 1:144866643  | ENST00000530130 | 24   | R/C | Cgc/Tgc |
| PDE4DIP  | 1:144994658  | ENST00000369351 | 25   | R/L | cGc/cTc |
| PHKB     | 16:47536987  | ENST00000455779 | 124  | R/C | Cgt/Tgt |
| PHYH     | 10:13330389  | ENST00000263038 | 217  | L/V | Ctg/Gtg |
| PSMD10   | X:107328208  | ENST00000217958 | 226  | G/D | gGt/gAt |
| PTPRT    | 20:40944422  | ENST00000373187 | 694  | P/A | Cct/Gct |
| PZP      | 12:9312951   | ENST00000261336 | 1003 | T/M | aCg/aTg |
| RGPD3    | 2:107073501  | ENST00000409886 | 111  | D/N | Gat/Aat |
| SEC31B   | 10:102257953 | ENST00000370345 | 566  | L/F | Ctc/Ttc |
| SLC25A47 | 14:100792549 | ENST00000361529 | 43   | T/M | aCg/aTg |
| SPATA6   | 1:48764419   | ENST00000371847 | 478  | C/Y | tGt/tAt |
| SPTBN2   | 11:66483347  | ENST00000529997 | 88   | G/E | gGa/gAa |
| SRRT     | 7:100482950  | ENST00000388793 | 425  | R/C | Cgc/Tgc |
| SSX5     | X:48054740   | ENST00000347757 | 19   | E/Q | Gag/Cag |
| TAS1R2   | 1:19166157   | ENST00000375371 | 819  | P/L | cCg/cTg |
| TEAD2    | 19:49852034  | ENST00000539846 | 93   | R/W | Cgg/Tgg |
| TMEM70   | 8:74888679   | ENST00000517439 | 55   | G/W | Ggg/Tgg |
| TMPRSS5  | 11:113565252 | ENST00000299882 | 245  | G/S | Ggc/Agc |
| TTC28    | 22:28394576  | ENST00000397906 | 1691 | K/E | Aag/Gag |
| TTC38    | 22:46674494  | ENST00000422713 | 135  | G/A | gGc/gCc |
| TTLL12   | 22:43568512  | ENST00000216129 | 464  | V/M | Gtg/Atg |
| TUBGCP6  | 22:50657782  | ENST00000248846 | 1473 | Q/H | caG/caT |
| UTP20    | 12:101736761 | ENST00000261637 | 1447 | D/N | Gac/Aac |
| VDR      | 12:48272895  | ENST00000395324 | 1    | M/T | aTg/aCg |
| VPS39    | 15:42454577  | ENST00000348544 | 771  | A/T | Gct/Act |
| WDR19    | 4:39241899   | ENST00000399820 | 789  | G/D | gGt/gAt |
| WDR34    | 9:131397002  | ENST00000372715 | 394  | P/S | Ccc/Tcc |
| WDR47    | 1:109547332  | ENST00000357672 | 351  | T/I | aCa/aTa |
| ZNF100   | 19:21909948  | ENST00000358296 | 389  | T/I | aCt/aTt |
| ZNF66    | 19:20989989  | ENST00000344519 | 528  | K/M | aAg/aTg |

|        |             |                 |     |     |         |
|--------|-------------|-----------------|-----|-----|---------|
| ZNF776 | 19:58265373 | ENST00000317178 | 292 | Y/C | tAt/tGt |
| ZNF90  | 19:20229486 | ENST00000418063 | 375 | G/S | Ggc/Agc |
