# Supplementary material for: Combined effects of FH (E404D) and ACOX2 (R409H) cause metabolic defects in primary cardiac malignant tumor
Source: PubMed Central journal article supplement (PMC6056498; doi:10.1038/s41420-018-0072-3), 2018-07-23
Supplement: 41420_2018_72_MOESM3_ESM.pdf [file 41420_2018_72_MOESM3_ESM.pdf]

**Table S3. 12 somatic nonsynonymous mutations (cancer-specific) were identified in cardiac tumor tissues.**

| <b>Gene</b>   | <b>Full names</b>                                               | <b>Location</b> | <b>Tt</b> | <b>Nt</b> | <b>AA variant</b> |
|---------------|-----------------------------------------------------------------|-----------------|-----------|-----------|-------------------|
| <i>TPR</i>    | <i>translocated promoter region, nuclear basket protein</i>     | chr1:186325455  | T/G       | T         | L617F             |
| <i>POMC</i>   | <i>proopiomelanocortin</i>                                      | chr2:25384276   | A/G       | A         | Y160H             |
| <i>PIK3CA</i> | <i>phosphatidylinositide-3-kinase, catalytic, subunit alpha</i> | chr3:178952085  | A/G       | A         | H1047R            |
| <i>TMEM8C</i> | <i>transmembrane protein 8C</i>                                 | chr9:136380644  | G/A       | G         | A162V             |
| <i>KIF21A</i> | <i>kinesin family member 21A</i>                                | chr12:39701378  | C/T       | C         | W1477*            |
| <i>PFKM</i>   | <i>phosphofructokinase, muscle</i>                              | chr12:48528736  | G/A       | G         | R253H             |
| <i>KIF23</i>  | <i>kinesin family member 23</i>                                 | chr15:69732348  | A/G       | A         | K607E             |
| <i>MYH3</i>   | <i>myosin, heavy chain 3, skeletal muscle, embryonic</i>        | chr17:10533774  | G/T       | G         | A1763D            |
| <i>JUP</i>    | <i>junction plakoglobin</i>                                     | chr17:39919518  | A/C       | A         | V405G             |
| <i>PIEZO2</i> | <i>piezo type mechanosensitive ion channel component 2</i>      | chr18:10855358  | A/C       | A         | Y304D             |
| <i>SETBP1</i> | <i>SET binding protein 1</i>                                    | chr18:42532328  | G/A       | G         | R1008H            |
| <i>ROBO3</i>  | <i>roundabout guidance receptor 3</i>                           | chr11:124735480 | C/A       | C         | R3S               |
